# Supplementary material for: Global, Satellite-Driven Estimates of Heterotrophic Respiration
Source: Copernicus journal article supplement (doi:10.5194/bg-2018-466), 2018-11-15
Supplement: Supplementary file 1 [file bg-2018-466-supplement.pdf]

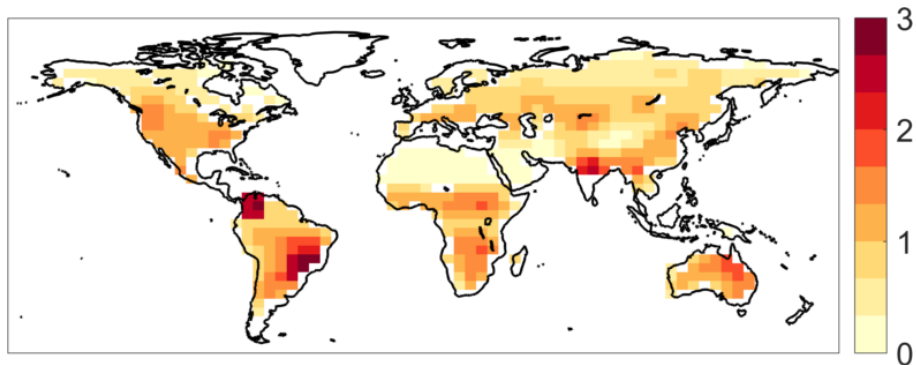

Figure S1: Root-mean-square sum of the normalized difference between the prior and posterior CMS-Flux NEP estimates (where the posterior flux is used for normalization).

5

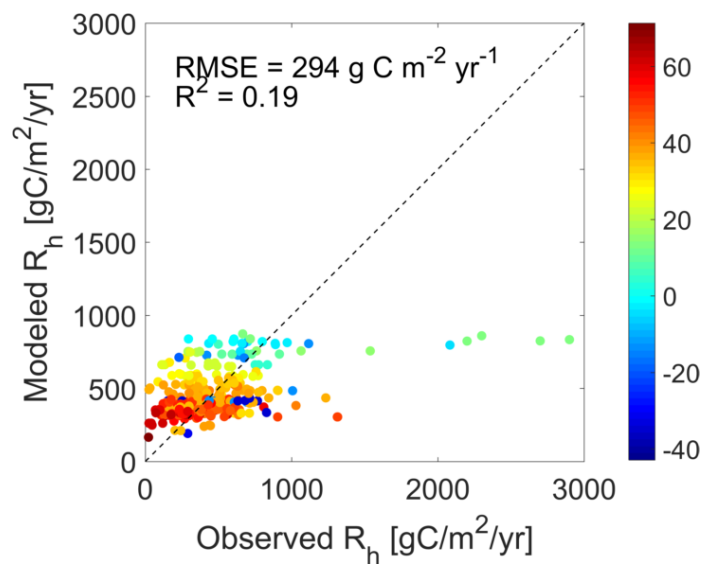

Figure S2: Comparison of observed annual respiration terms at SRDB sites vs. bottom-up estimates at the same sites for (left) 1979 soil respiration sites and (right) 362 heterotrophic respiration sites. Parameters in the bottom-up equations are sequentially optimized on the entire  $R_s$  dataset. All  $R_h$  observations are then used to optimize the parameters of the  $R_h$ - $R_s$  relationship. Each point denotes a single experiment and is colored by the experiment's latitude.

10

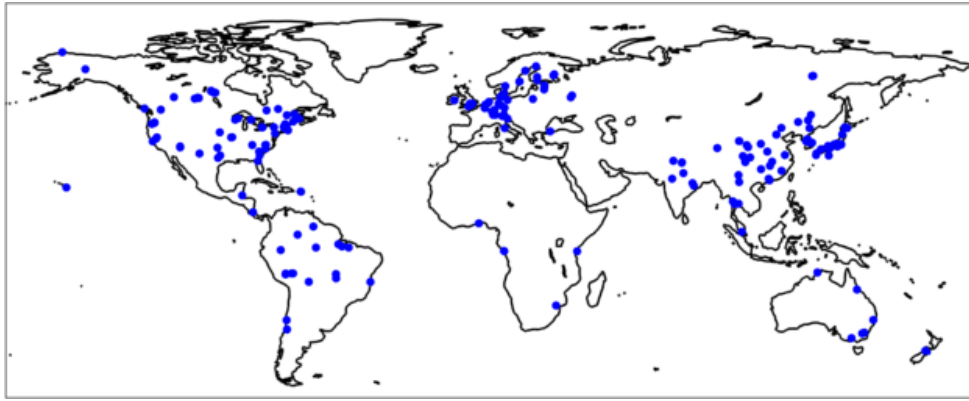

Figure S3: Locations of  $R_h$  experiments in SRDB.

5

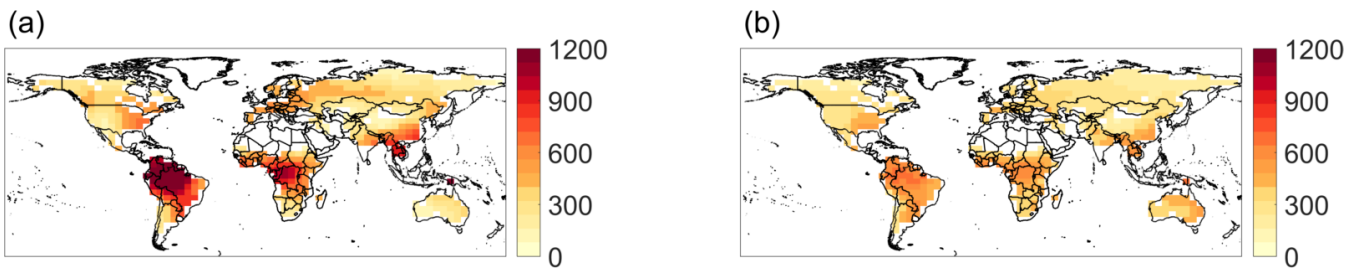

Figure S4: Mean  $R_h$  [gC m<sup>-2</sup> yr<sup>-1</sup>] from the (left) top-down and (right) bottom-up models.

10

15
